# Supplementary material for: Photo-polymerization using quantum dots for stable epoxy coatings
Source: Royal Society of Chemistry journal article supplement (doi:10.1039/d4im00026a), 2024-01-01
Supplement: d4im00026a1.pdf [file d4im00026a1.pdf]

## Supporting Information

# Photo-Polymerization using Quantum Dots for Stable Epoxy Coatings

*Kerolos B. Riad<sup>a</sup>, M. Reza Kholghy<sup>a</sup>, Paula M. Wood-Adams<sup>b,c\*</sup>*

<sup>a</sup> Energy and Particle Technology Laboratory, Department of Mechanical and Aerospace Engineering, Carleton University, 1125 Colonel By Dr, Ottawa, Ontario, Canada. K1S 5B6.

<sup>b</sup> Laboratory for the Physics of Advanced Materials, Department of Chemical and Material Engineering, Concordia University, 1550 De Maisonneuve Blvd. W., Montreal, Quebec, Canada. H3G 2J2.

Current affiliation:

<sup>c</sup> Faculty of Science and Engineering, University of Northern British Columbia, 3333 University Way, Prince George, BC, Canada. V2N 4Z9

### Corresponding Author

Email: Paula.Wood-Adams@unbc.ca (P.M.W)

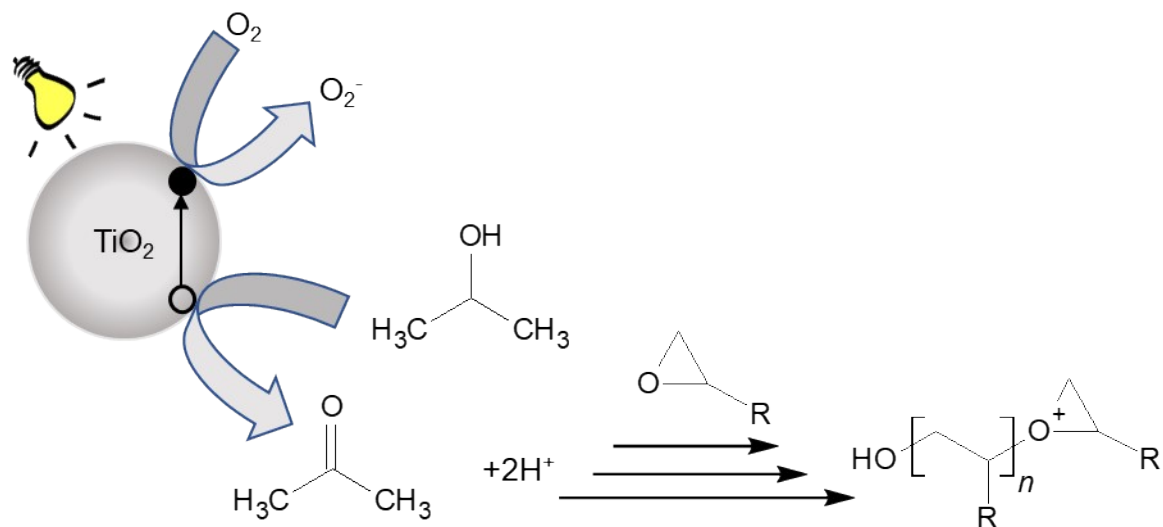

Fig. S1: Mechanism for the photo-polymerization of epoxy in the presence of isopropanol using semiconducting nanoparticles, from Riad et al, 2020.<sup>1</sup>

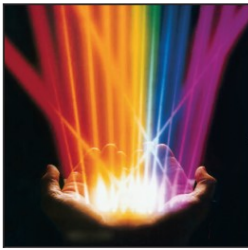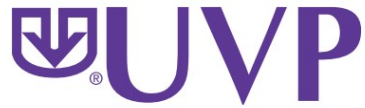

Corporate HQ: UVP, Inc.  
2066 W. 11th Street  
Upland, CA 91786  
(800) 452-6788 | (909) 946-3197  
Fax: (909) 946-3597

European office: Ultra-Violet Products Ltd.  
Unit 1, Trinity Hall Farm Estate,  
Nuffield Rd. Cambridge CB4 1TG UK  
+44(0)1223-420022  
Fax: +44(0)1223-420561

## UV Spectral Chart

### 365nm UV without Filter

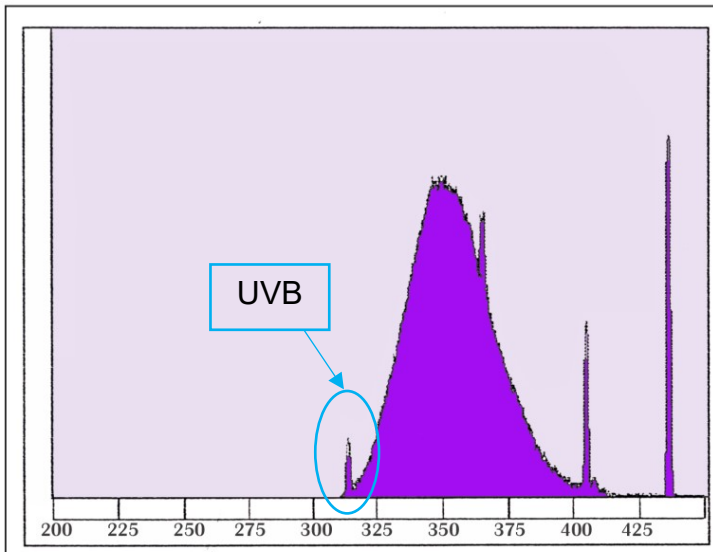

Figure S2: UV spectral chart of the UVA crosslinker used in this study, as provided by UVP.

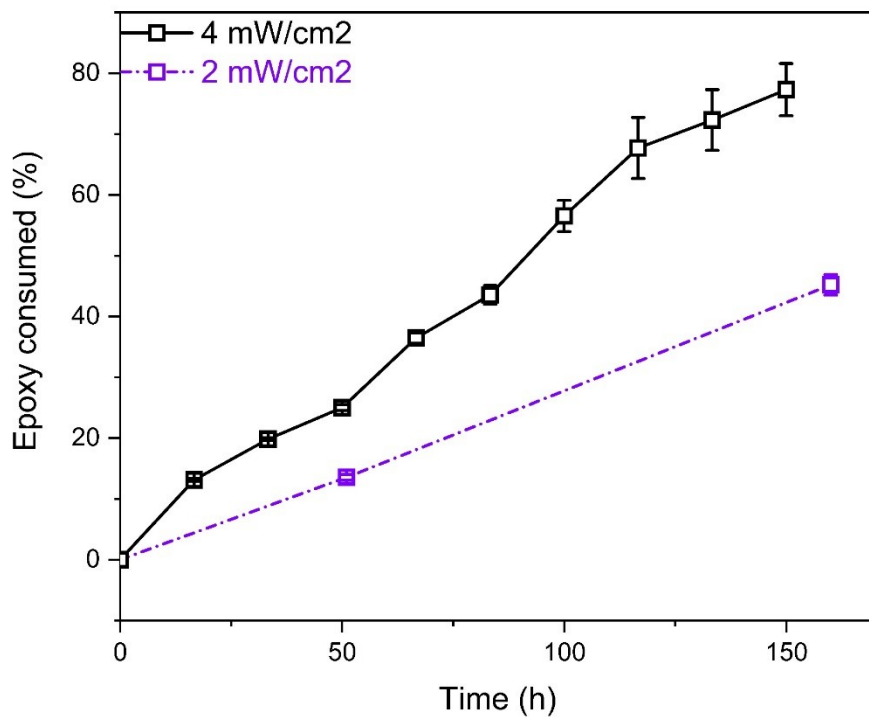

Figure S3: effect of light intensity on epoxy photopolymerization reaction kinetics. Samples consist of epoxy, 1-Phenethyl alcohol (10 wt%), Methyl Viologen (0.5 wt%) and P25 (5 wt%).

---

1 K. B. Riad, A. A. Arnold, J. P. Claverie, S. V. Hoa and P. M. Wood-Adams, Photopolymerization using metal oxide semiconducting nanoparticles for epoxy-based coatings and patterned films, *ACS Appl. Nano Mater.*, 2020, **3**, 2875-2880.
